# Supplementary material for: Tribological Properties of Borate-Based Protic Ionic Liquids as Neat Lubricants and Biolubricant Additives for Steel-Steel Contact
Source: MDPI journal article supplement (doi:10.3390/lubricants10100269), 2022-10-19
Supplement: s1 [file s1]

# Tribological Properties of Borate-Based Protic Ionic Liquids as Neat Lubricants and Biolubricant Additives for Steel-Steel Contact

Alfonso Sierra <sup>1</sup>, Michael G. Coleman <sup>2</sup> and Patricia Iglesias <sup>1,\*</sup>

<sup>1</sup> Department of Mechanical Engineering, Kate Gleason College of Engineering, Rochester Institute of Technology, Rochester, NY 14623-5603, USA; as7268@rit.edu

<sup>2</sup> School of Chemistry and Materials Science, College of Science, Rochester Institute of Technology, Rochester, NY 14623-5604, USA; mgcsch@rit.edu

\* Correspondence: pxieme@rit.edu; Tel.: +1-585-475-7694

**Table S1.** Elemental composition (wt. %) of 316 stainless steel disks.

| Element     | Fe          | Cr          | Ni          | Mo        | Si      | P        | S        |
|-------------|-------------|-------------|-------------|-----------|---------|----------|----------|
| Content (%) | 64.93–71.50 | 16.50–18.50 | 10.00–13.00 | 2.00–2.50 | 0.0–1.0 | 0.0–0.05 | 0.0–0.02 |

**Table S2.** Elemental composition (wt. %) of AISI 52100 steel balls.

| Element     | Fe          | Cr        | C         | Mn        | Si        | S     | P     |
|-------------|-------------|-----------|-----------|-----------|-----------|-------|-------|
| Content (%) | 96.50–97.32 | 1.30–1.60 | 0.98–1.10 | 0.25–0.45 | 0.15–0.30 | 0.025 | 0.025 |

**Table S3.** Mechanical polishing steps for the 316 stainless steel disks.

| Step      | Type            | Speed   | Force | Lubricant                     | Time  |
|-----------|-----------------|---------|-------|-------------------------------|-------|
| Grinding  | SiC #220        | 300 rpm | 15N   | Water                         | 3 min |
| Grinding  | SiC #500        | 300 rpm | 15N   | Water                         | 3 min |
| Grinding  | SiC #1200       | 300 rpm | 15N   | Water                         | 3 min |
| Polishing | Woven polyester | 150 rpm | 15N   | Diamond suspension, 9 $\mu$ m | 3 min |
| Polishing | Synthetic nap   | 150 rpm | 15N   | Diamond suspension, 3 $\mu$ m | 5 min |

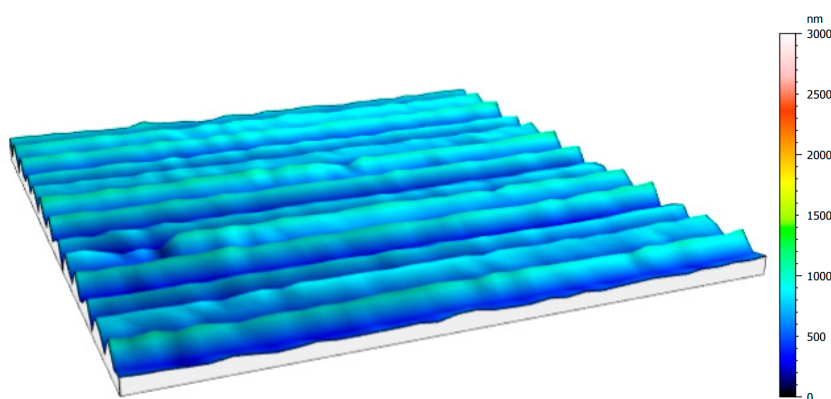

**Figure S1.** 3D Profile of a polished disk.

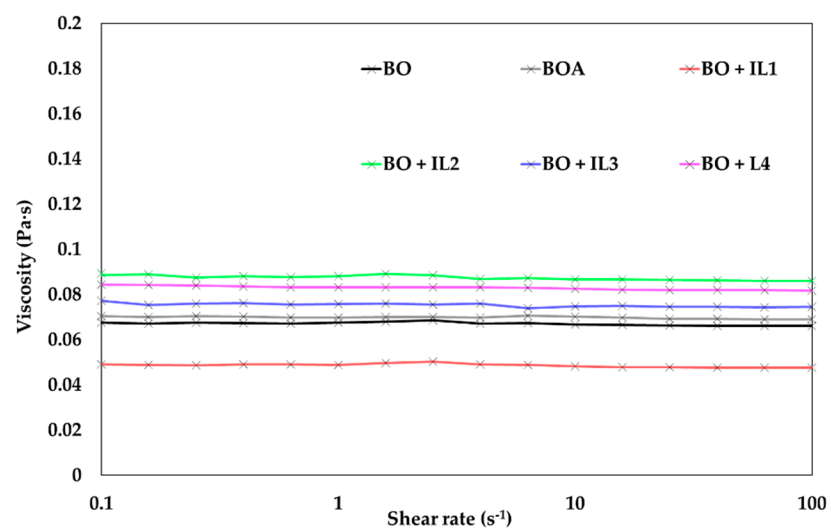

**Figure S2.** Variation of viscosity with shear rate for BO, BOA, BO + IL1, BO + IL2, BO + IL3, and BO + IL4.
